# Supplementary material for: Electrocatalytic Selenium Redox Reaction for High-Mass-Loading Zinc-Selenium Batteries with Improved Kinetics and Selenium Utilization
Source: Research Square preprint supplement (doi:10.21203/rs.3.rs-1301505/v1), 2022-02-08
Supplement: Supplementary file 1 [file 40535174605c9af93cf97248.docx]

**Supporting Information**

**Electrocatalytic Selenium Redox Reaction for High-Mass-Loading Zinc-Selenium Batteries with Improved Kinetics and Selenium Utilization**

*Longtao Ma1,2, Yiran Ying3, Shengmei Chen1, Ze Chen1, Hongfei Li*4, Haitao Huang*3, Lingzhi Zhao5, Chunyi Zhi*1,4, 6*

*1Department of Materials Science and Engineering, City University of Hong Kong*

*83 Tat Chee Avenue, Kowloon, Hong Kong 999077, P. R. China.*

*2Frontiers Science Center for Flexible Electronics, Institute of Flexible Electronics, Northwestern Polytechnical University, Xi'an, 710072, P. R. China.*

*3Department of Applied Physics and Research Institute for Smart Energy, The Hong Kong Polytechnic University, Hung Hom, Kowloon, Hong Kong 999077, P. R. China.*

*4Songshan Lake Materials Laboratory, Dongguan, Guangdong, 523808, P. R China.*

*5Guangdong Provincial Engineering Technology Research Center for Low Carbon and Advanced Energy Materials, Institute of Semiconductor Science and Technology, South China Normal University, Guangzhou 510631, P. R. China.*

*6Hong Kong Institute for Clean Energy, City University of Hong Kong, Kowloon 999077, Hong Kong, P. R. China.*

*Corresponding authors: Prof. Chunyi Zhi, Email: cy.zhi@cityu.edu.hk; Dr. Hongfei Li, Email: lihf@sslab.org.cn; Prof. Haitao Huang, aphuang@polyu.edu.hk.*

**Experiment**

**Fabrication of KCu[Co(CN)6], KNi[Co(CN)6] and KCo[Co(CN)6] frameworks**

The KCu[Co (CN)6], KNi[Co(CN)6] and KCo[Co(CN)6] samples are fabricated by a simple co-precipitation route according to our previous work (Adv. Energy Mater. 2019, 1902446). In detail, firstly, 0.1 mmol K3[Co(CN)6] (Aladdin), and 0.7 g sodium dodecyl sulfate (SDS) (Aladdin) are dissolved in 20 mL DI water to achieve solution A. Then, 0.2 mmol Cu(CH3COO)2·H2O, Ni(CH3COO)2·4H2O or Co(CH3COO)2·4H2O (Aladdin) is dissolved into 20 mL DI water to obtain solution B. After that, solution B is slowly added into solution A to form a mixture which is subsequently aged in ambient environment for 24 h. The resulted earthy blue, green or pink precipitates are then collected by centrifugation and repeatedly washed with DI water and ethanol for several times. Finally, the products are obtained by freeze-drying procedure under a vacuum dryer for more than 48 h.

**Fabrication and activation of Cu[Co(CN)6], Ni[Co(CN)6] and Co[Co(CN)6] frameworks**

The Cu[Co(CN)6], Ni[Co(CN)6] and Co[Co(CN)6] are developed by *in-situ* extracting K ions from KCu[Co (CN)6], KNi[Co(CN)6] and KCo[Co(CN)6] frameworks, respectively. Meanwhile, in this process, the Cu Ni and Co species are exposed to ion diffusion channels in Cu[Co(CN)6], Ni[Co(CN)6] and Co[Co(CN)6] framework by removing K ions from the channel. The Cu Ni and Co species will act as chemical adsorption sites for Se confinement and electrocatalytic centers for Se conversion reaction.

**Fabrication of Se-in-Cu[Co(CN)6], Se-in-Ni[Co(CN)6] and Se-in-Co[Co(CN)6] frameworks**

The Se is infiltrated into the pores of Cu[Co(CN)6], Ni[Co(CN)6] and Co[Co(CN)6] frameworks by melt diffusion method. Taking Se-in-Cu[Co(CN)6] as an example, 100 mg of Cu[Co(CN)6] powder is firstly grinded together with 300 mg of Se to get a fine mixture in an argon filled glovebox to prevent water absorption in the pores of Cu[Co(CN)6]. The mixture is sealed in a Pyrex tube and heated at 260 °C for 12 h to generate the Se-in-Cu[Co(CN)6] sample with 80 wt.% Se loading. Similarly, Se-in-Ni[Co(CN)6] and Se-in-Co[Co(CN)6] frameworks are fabricated using above melt diffusion method.

**Characterization**

The crystal structures of Cu[Co(CN)6], Ni[Co(CN)6] and Co[Co(CN)6] frameworks with or without Se accommodation are characterized by a Bruker D2 Phaser X-ray diffractometer with radiation from a Cu target (λ =0.154 nm) operating at 30 kV and 10 mA, respectively. The micro-structures and morphologies of active materials are evaluated by using field emission scanning electron microscopy (FESEM; JEOL JSM-6700F, 5 kV). The chemical state and composition are analyzed using an ESCALAB 250 photoelectron spectroscopy (Thermo Fisher Scienctific) at 1.2 × 10-9 mbar using Al Kα X-ray beam (1486.6 eV). All X-ray photoelectron spectroscopy spectra are calibrated by shifting the detected adventitious carbon C 1s peak to 284.4 eV. The N2 adsorption-desorption isotherms are obtained by using a Micrometric ASAP 2020 instrument. The specific surface area is obtained via BrunauerEmmett-Teller (BET) method using adsorption data and the pore size distribution is derived from the adsorption branch by using the Barrett-Joyner-Halenda (BJH). V. TGA is carried out on a simultaneous thermal analyzer, PerkinElmer STA6000 at 30-600 °C with an N2 flow of 40 mL⋅min-1.

**Preparation of electrolytes**

The liquid aqueous electrolytes is first prepared by dissolving 4 mol·kg-1 Zn(OTf)2 (>99%; Aladdin) in DI water. Aqueous gel polymer electrolyte is prepared by mixing 10 wt% poly(ethylene oxide) (PEO; average molecular weight, *M*v ≈ 400000; Aladdin) with 4 M Zn(OTf)2 electrolyte and heated at 70 °C for 1 h in sealed glass molds. The sticky semi-solid gel electrolyte is obtained after cooling to room temperature.

**Electrochemical tests**

The Se reduction reaction tests: The three-electrode electrochemical cell is used with the as-prepared PBA catalysts supported on glass carbon (GC) as the working electrode (170 μg⋅cm-2), a platinum foil as the counter electrode and Ag/AgCl (saturated KCl) as the reference electrode. Before electrocatalytic testing, high-purity N2 gas is bubbled through the electrolyte for over 10 min to remove the dissolved O2. The electrochemical accessibility of the working electrode is optimized by potential cycling between 0 and 2.1 V at 50 mV⋅s -1 in 4 M Zn(OTf)2 aqueous solution with 10 mM Se added until stable CV curves are obtained. For the Se reduction/oxidation tests, polarization curves are recorded at a scan rate of 5 mV⋅s-1.

**Battery tests**

Typically, the active materials are mixed with Ketjen Black and polyvinylidene fluoride (PVDF) with a weight ratio of 8:1:1. Then, the mixture is dispersed in a small methyl-2-pyrrolidinone (NMP) solvent by grinding in an agate mortar to achieve a stably homogeneous paste. After that, the paste is painted on carbon fiber cloth (CFC) and dried at 40 oC for 12 h under vacuum condition. The loading mass is about 4-10 mg⋅cm-2. The battery is constructed with as-above synthesized electrode as cathode, glass fiber as separator and metallic Zn foil as anode in CR2032 coin cells. We use 4 M Zn(OTf)2 aqueous solution with PEO added as electrolyte. The CV curves are carried out using CHI 760D workstation (Chenhua, China). Galvanostatic cycling studies are performed using LAND battery testing system (CT3001A, Wuhan, China) at room temperature.

**Computational Details**

All the density functional theory (DFT) calculations are performed within the projector-augmented wave scheme by using the plane-wave code VASP1. Perdew-Burke-Ernzerhof flavor of generalized gradient approximation is applied for the exchange-correlation functional2. Kinetic energy cutoff is set as 400 eV, and energy/force convergence criteria are set as 10-5 eV and 0.05 eV/Å, respectively. Gamma-centered 3×3×1 Monkhorst-Pack k-meshes are used for the Brillouin zone sampling, while a denser 5×5×1 mesh is applied during DOS calculations.. DFT-D3 scheme with Becke-Jonson damping is applied to account for the van der Waals correction3. Vacuum layer with the thickness of at least 20 Å is added to prevent spurious interactions between adjacent cells. During the geometric optimization, the bottom two layers of atoms are fixed and the rest of them are allowed to relax. All the structures are visualized with the VESTA package4. Decomposition energy barriers were calculated using the climbing-image nudged elastic band (CI-NEB) method5. AIMD simulations are performed at 300 K with NVT ensemble and Nosé-Hoover thermostat. The time step is set as 0.1 fs with a total number of steps of 5000 for each structure.





**Figure S1**. XRD patterns of Cu[Co(CN)6] and treated at 300 oC for 12 h under N2 atmosphere.


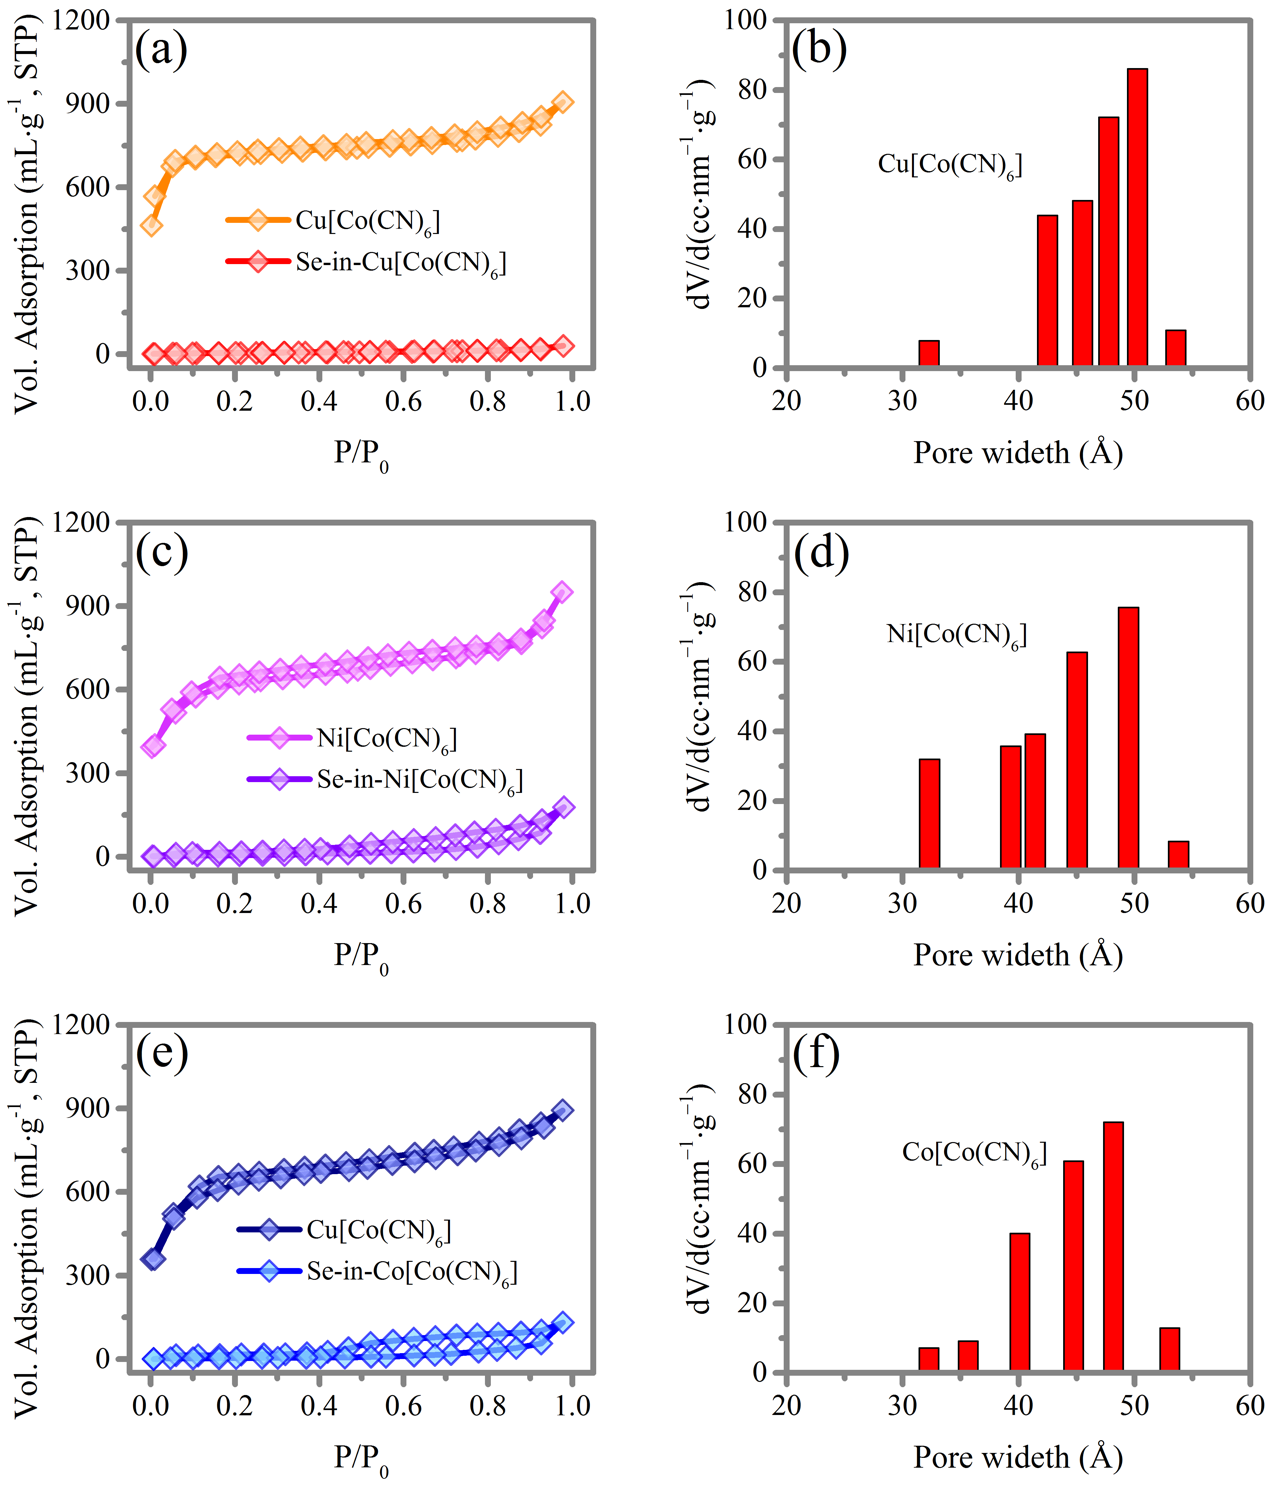


**Figure S2**. N2 absorption and desorption isotherms of (a) CuCo(CN)6 and Se-in-CuCo(CN)6; (c) NiCo(CN)6 and Se-in-NiCo(CN)6; (e) CoCo(CN)6 and Se-in-CoCo(CN)6 frameworks. Pore-size distributions of (b) CuCo(CN)6, (d) NiCo(CN)6 and (f) CoCo(CN)6 frameworks.

**Notes:**

The Cu[Co(CN)6], Ni[Co(CN)6] and Co[Co(CN)6] frameworks show mixed type I and IV isotherms. The sharp adsorption increase in the low-pressure region indicates the existence of abundant micropores. The pore size distribution then analyzed based on the isotherms, which shows rang 30-55 Å. The Brunauer-Emmett-Teller (BET) surface area obtained on the basis of the aforementioned adsorption isotherm of Cu[Co(CN)6], Ni[Co(CN)6] and Co[Co(CN)6] are 762.6, 665.3 and 636.9 m2⋅g-1, respectively. After selenium infiltration, the surface area decreased to 63.2, 183.4 and 205.7 m2⋅g-1, respectively.


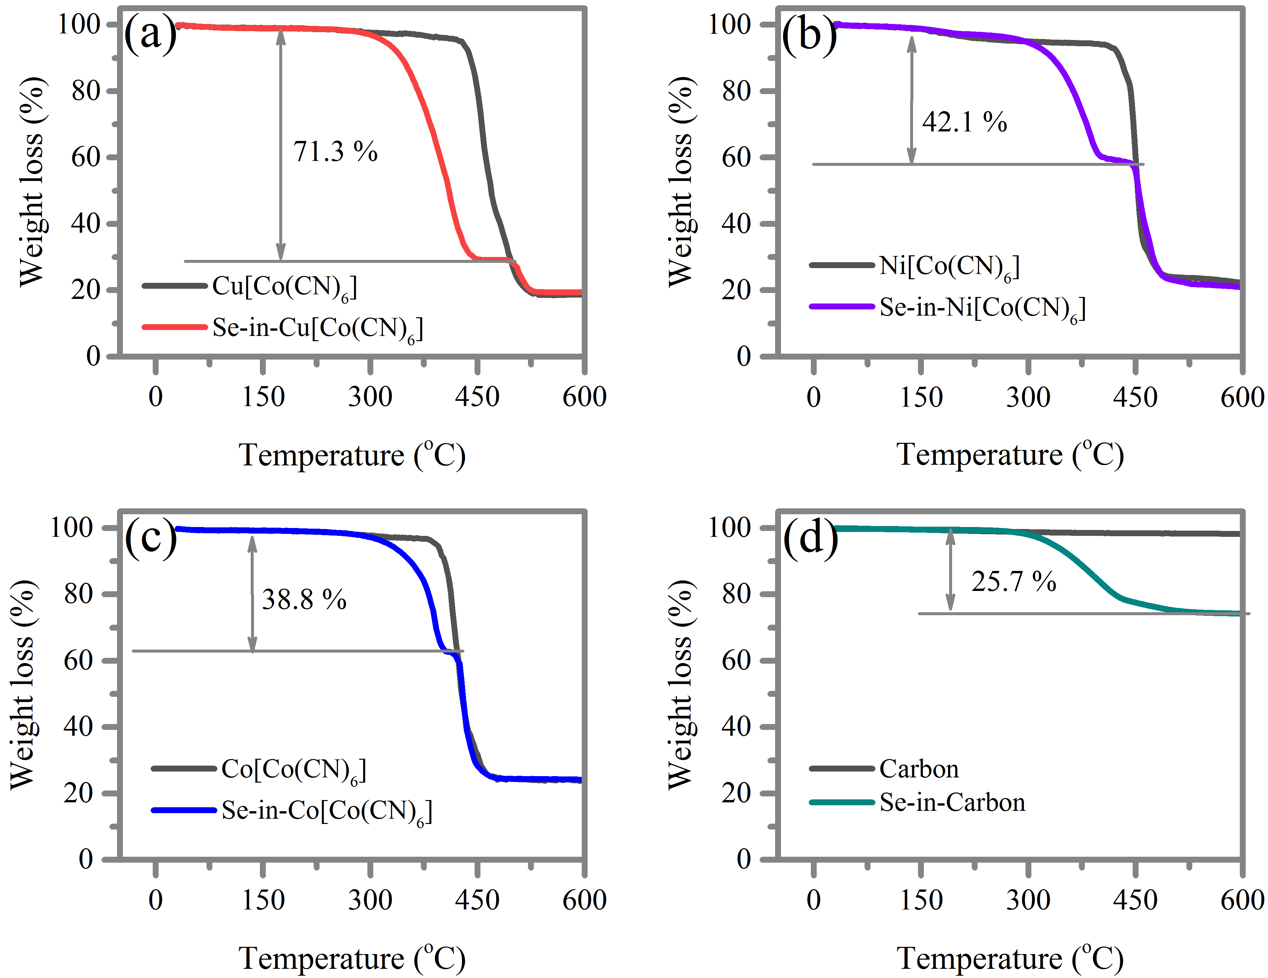


**Figure S3**. TGA curves of (a) Cu[Co(CN)6] and Se-in-Cu[Co(CN)6], (b) Ni[Co(CN)6] and Se-in-Ni[Co(CN)6], (c) Co[Co(CN)6] and Se-in-Co[Co(CN)6], (d) carbon and Se-in-carbon.

**Table S1.** Adsorption energy of Se and ZnSe on Cu[Co(CN)6], Ni[Co(CN)6] and Co[Co(CN)6] frameworks.

| System | Ead (Se8) (eV) | Ead (ZnSe) (eV) |
| --- | --- | --- |
| Cu[Co(CN)6] | -2.28 | -0.28 |
| Ni[Co(CN)6] | -1.79 | -0.24 |
| Co[Co(CN)6] | 0.51 | 1.85 |


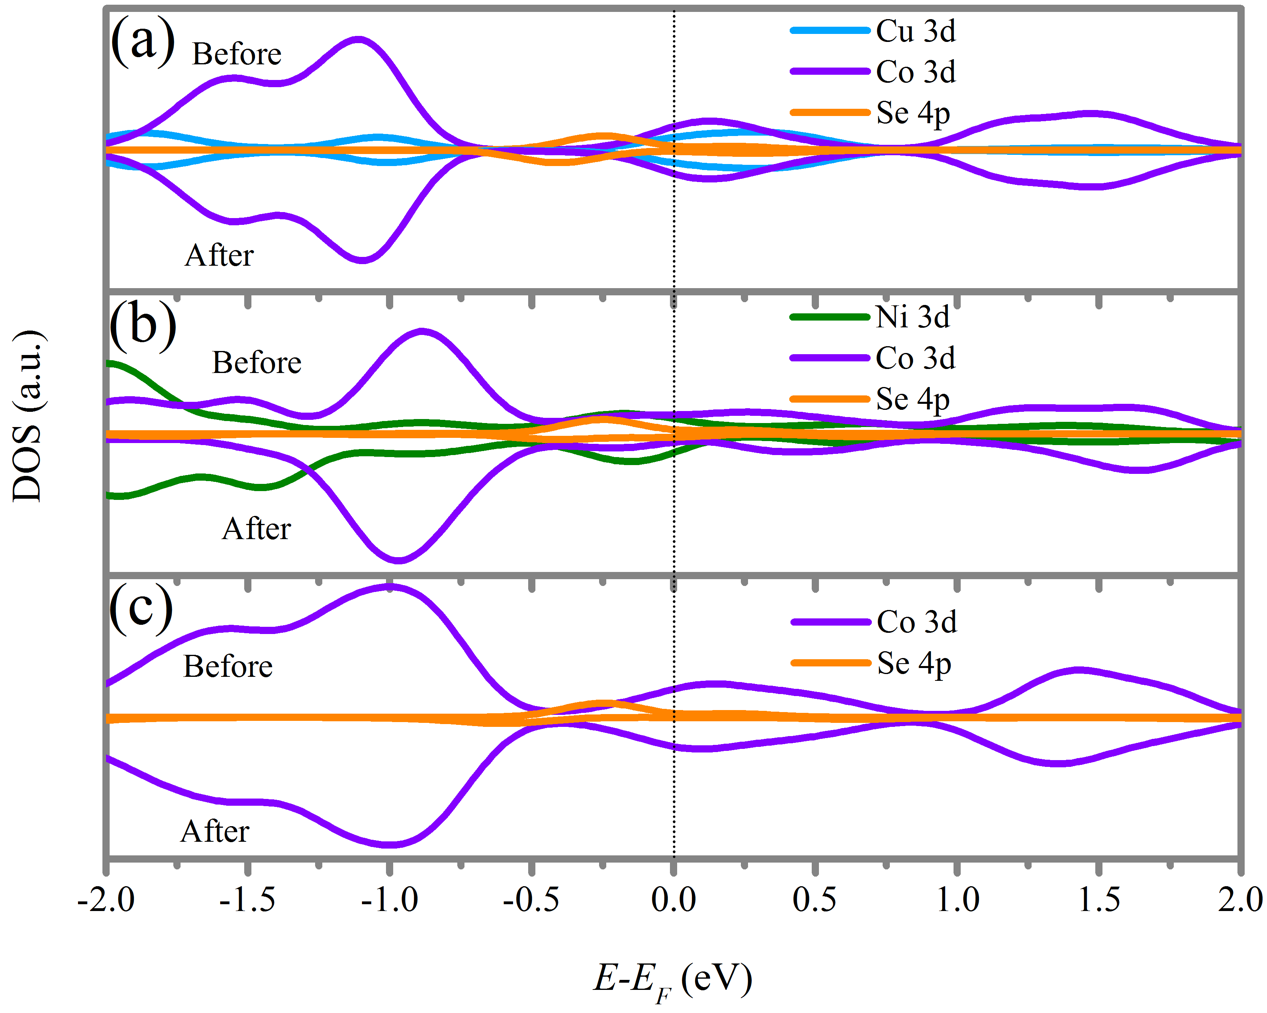


**Figure S4.** Partial density of states (PDOS) of Cu/Ni/Co-3*d* and Se 4*p* orbitals for (a) Cu[Co(CN)6], (b) Ni[Co(CN)6], and (c) Co[Co(CN)6] before (upper panel) and after (lower panel) ZnSe adsorption. Fermi level (EF) is set at 0 (denoted in the dotted line).





**Figure S5**. Electrochemical stability window of 4 M Zn(OTf)2 aqueous electrolyte and aqueous gel polymer electrolyte.


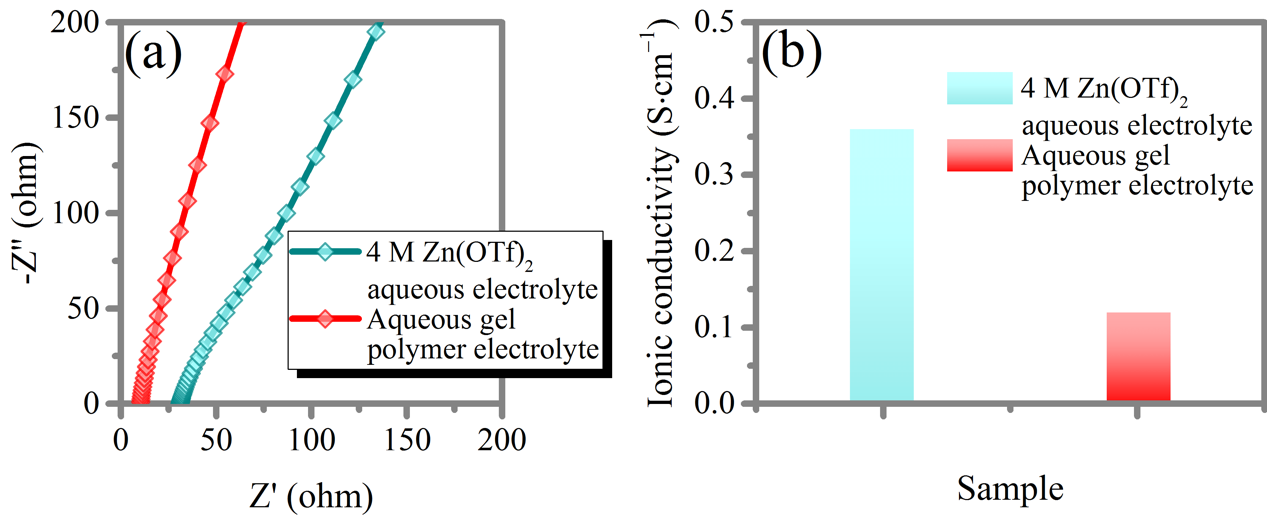


**Figure S6**. (a) EIS spectra of SS||SS symmetric cell using 4 M Zn(OTf)2 aqueous electrolyte and aqueous polymer electrolyte and (b) corresponding ionic conductivities determined from EIS.


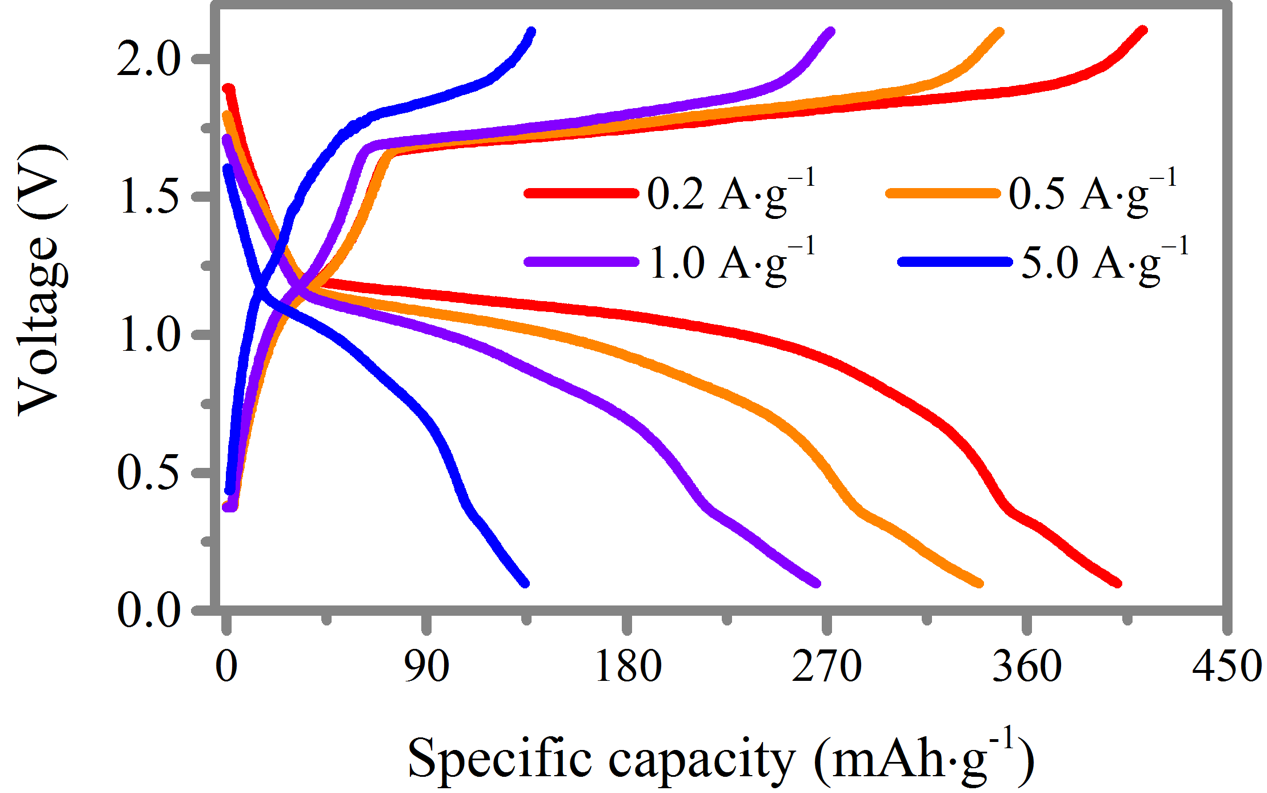


**Figure S7**. Galvanostatic charge/discharge curves of Zn||Se batteries employing Se-in-porous carbon cathode.

**Reference**

1. a) G. Kresse, J. Furthmüller, Phys. Rev. B 1996, 54, 11169; b) G. Kresse, D. Joubert, *Phys. Rev. B* 1999, 59, 1758.

2. J. P. Perdew, K. Burke, M. Ernzerhof, *Phys. Rev. Lett.* 1996, 77, 3865.

3. a) S. Grimme, J. Antony, S. Ehrlich, H. Krieg, *J. Chem. Phys*. 2010, 132, 154104; b) S. Grimme, S. Ehrlich, L. Goerigk, *J. Comput. Chem*. 2011, 32, 1456.

4. K. Momma, F. Izumi, *J. Appl. Crystallogr.* 2011, 44, 1272.

5. G. Henkelman, B. P. Uberuaga, H. Jónsson, *J. Chem. Phys.* **2000**, 113, 9901.
